# Supplementary material
Source: publisher figshare collection journal article supplement (https://gsajournals.figshare.com/ndownloader/files/13192331)
Supplement: Supplementary file 1 [file 13192331]

**Table S1. Primers (5’ to 3’)** Primers used for this study are listed below.

**Sequencing primers of PRP4ka gene (At3g25840)**

PRP4_1 CCTGATTTTCTATGTAGGAG Fragment amplification

PRP4_2 GTAACTCGCCAAACTGATAG Fragment amplification

PRP4_3 TAATTGGGATGATGCAGAGG Fragment amplification

PRP4_4 CAAACCTGCAACGAGACATG Fragment amplification

PRP4_5 TCAGGCGTAAATGCTGTTTG sequencing

PRP4_6 AATCTGGTCTGTTCTAATCC sequencing

PRP4_7 GAGAAACTTCTAGGTCAAGG sequencing

PRP4_8 ATATGATGCGGTAGATGACC sequencing

PRP4_9 GTTTAGCATTGAGGCATTCC sequencing

PRP4_10 GGTATCCGAAAAGTGGTATG sequencing

PRP4_11 AGCAATGAATAGCTGCTTTG sequencing

PRP4_12 ATATTGAAGAAGCTGGCAGG sequencing

PRP4_13 TTGGCTGCTGTCTGTATGAG sequencing

PRP4_14 GACTGTGTCACAGGCATTAG sequencing

PRP4_15 TTCTGTGAACCTTTTGCATC sequencing

**Sequencing primers of SAC3a gene (At2g39340)**

Sac3a_1 GCAAGTCCGAAAGATAATGG Fragment amplification

Sac3a_2 GTTATAGATCATGCAGGCAG Fragment amplification

Sac3a_3 GTTGCTTTGCATTGCTAATG Fragment amplification

Sac3a_4 TTCATCACAGTTGCTTTTGG Fragment amplification

Sac3a_5 CTACCAAGTTAAATCTGGAG sequencing

Sac3a_6 GACGTTGATGATAAAGCATG sequencing

Sac3a_7 GAGGCTTTAGCATCCTAATG sequencing

Sac3a_8 GAGGTTACCAAAGTACGAAC sequencing

Sac3a_9 CAGACAGTTTAGACATGATC sequencing

Sac3a_10 AATAATGCCGATGCTTGTAG sequencing

Sac3a_11 AAAACGCTGTCGCTTGACAG sequencing

Sac3a_12 TAGCTGTTGGTTTAATGAGG sequencing

Sac3a_13 TCTTTTTGACACCATGACTG sequencing

Sac3a_14 TCTGTTGTCTATTCCTGAGG sequencing

Sac3a_15 GGGTAAGGGTCATATGATAC sequencing

**PCR Primers for Genotyping**

*Prp4ka-2* (dCAPS: *Dde*I)

Prp4ka-2_F GAAAAGGAAAGGGAGGGTGAAAAAGACTG

Prp4ka-2_R TCTAGGTCATCTACCGCATC

*Prp4ka-4* (CAPS: *Tfi*I)

Prp4ka-4_F PRP4-9 (See above)

Prp4ka-4_R ATGAAACATGTCAGCTGACC

SALK_035104C (*prp4kb-1*: T-DNA insertion)

PRP4B_F ATCTCCGTGAGATTGTGAAG

PRP4B_R ATCTAACGGATGGTCGTAGG

LBa1 TGGTTCACGTAGTGGGCCATCG + PRP4B_R for T-DNA amplification

*Sac3a-6* (dCAPS: *Scr*FI)

Sac3a-6_F TGACTGATATTTTTGATTGACTTATTTCCA

Sac3a-6_R CAACAGGAAATGAATCCTACATG

**RT-PCR**

Spreading5’ AGGCTGCATCTTCAGGCATC GFP nascent RNA

egfp3’ TTTACTTGTACAGCTCGTCC GFP nascent RNA

actin-f GCCATCCAAGCTGTTCTCTC Actin control

actin-r GGGCATCTGAATCTCTCAGC Actin control
